# Supplementary material for: Dynamic Microvascular Monitoring with MOBILE: Miniaturized Omnidirectional Broadband Photoacoustic Imaging System for Living Entities
Source: Research Square preprint supplement (doi:10.21203/rs.3.rs-7154196/v1), 2025-08-27
Supplement: Supplementary file 1 [file 10122cd38176e74a3aadd909.docx]

**Supplementary Information:**

Dynamic Microvascular Monitoring with **MOBILE**: Miniaturized Omnidirectional Broadband Photoacoustic Imaging System for Living Entities

Li et al.

Contents

[**Supplementary Note S1: Sensor design and characterization.** 2](#_Toc203394429)

[**1a. Optical ultrasound sensor design** 2](#_Toc203394430)

[**1b. Theoretical analysis and numerical simulation** 4](#_Toc203394431)

[**Supplementary Note S2: Image reconstruction and processing** 7](#_Toc203394432)

[**2a. Theoretical framework** 7](#_Toc203394433)

[**2b. Image reconstruction** 8](#_Toc203394434)

[**2c. Post-processing pipeline** 9](#_Toc203394435)

[**Supplementary Note S3: Experimental validation** 12](#_Toc203394436)

[**3a. Phantom imaging** 12](#_Toc203394437)

[**3b. Small animal imaging** 13](#_Toc203394438)

[**3c. Human subject imaging** 14](#_Toc203394439)

[**Supplementary Note S4: Dynamic imaging on exercise subjects** 17](#_Toc203394440)

[**4a. Integration of rotational scanning probe for exercise monitoring** 17](#_Toc203394441)

[**4b. Dynamic monitoring of exercise-induced microvascular responses** 17](#_Toc203394442)

[**Supplementary Note S5: Comparative analysis** 20](#_Toc203394443)

[**5a. Comparative analysis with current imaging modalities** 20](#_Toc203394444)

[**5b. Comprehensive performance analysis of state-of-the-art ultrasound sensors** 21](#_Toc203394445)

**Supplementary Note S1: Sensor design and characterization.**

**1a. Optical ultrasound sensor design**

The optical phase variation of a single-pass light induced by the incident ultrasound wave in the absence of a resonator can be expressed by [1]:

where is the interaction time between the ultrasound and the probe light, *c* denotes the speed of light, *L* denotes the fibre length, *S*m represents acoustic susceptibility impulse response, and *p*i depicts the incident acoustic waveform. Its Fourier transform yields:

For ultrasound detection using a 1550-nm probe light (*ω*0≈2π×200 THz) over a 3-mm fibre segment, the induced phase variation is merely 1.8×10−8 rad/Pa. To enhance this sensitivity, we implement a single-longitudinal, single-polarization fibre laser cavity confined by two photo-inscribed Bragg gratings. The cavity enables continuous acousto-optic interaction, resulting in a laser phase variation [2]:

with its frequency-domain expression:

The laterization gain factor amplifies the phase variation to approximately 10−4 rad/Pa at 20 MHz.

The acoustically induced laser phase variation is measured through self-delayed heterodyne detection (Figure S1a). The modulated laser light can be expressed as [2, 3]:

where represents the laser amplitude. After beam splitting, one branch undergoes frequency shift via an acoustic optical modulator (*ω*AOM=2π×100 MHz), while the other experiences a time delay *τ*, yielding:

The heterodyne beat signal detected by a photodetector is:

where denotes the initial phase of local signal with the frequency equal to AOM and is the optical-to-electrical conversion coefficient. The beat signal undergoes IQ demodulation, yielding quadrature and in-phase components through Hilbert transformation. The phase change is obtained as [4, 5]:

Its spectral profile follows:

The transfer function provides an additional sensitivity gain factor of 2 at ,. Through systematic optimization, a 2-m fibre length difference achieves optimal alignment between the gain factor and sensor vibrational modes, ensuring adequate detection bandwidth for ultrasonic frequencies. Figure S1b-c. represent the system noise spectrum and noise-equivalent pressure density (NEPD) spectra, showing an average NEPD of 1.5 mPa/Hz1/2 within the bandwidth of 0.3 - 80 MHz.


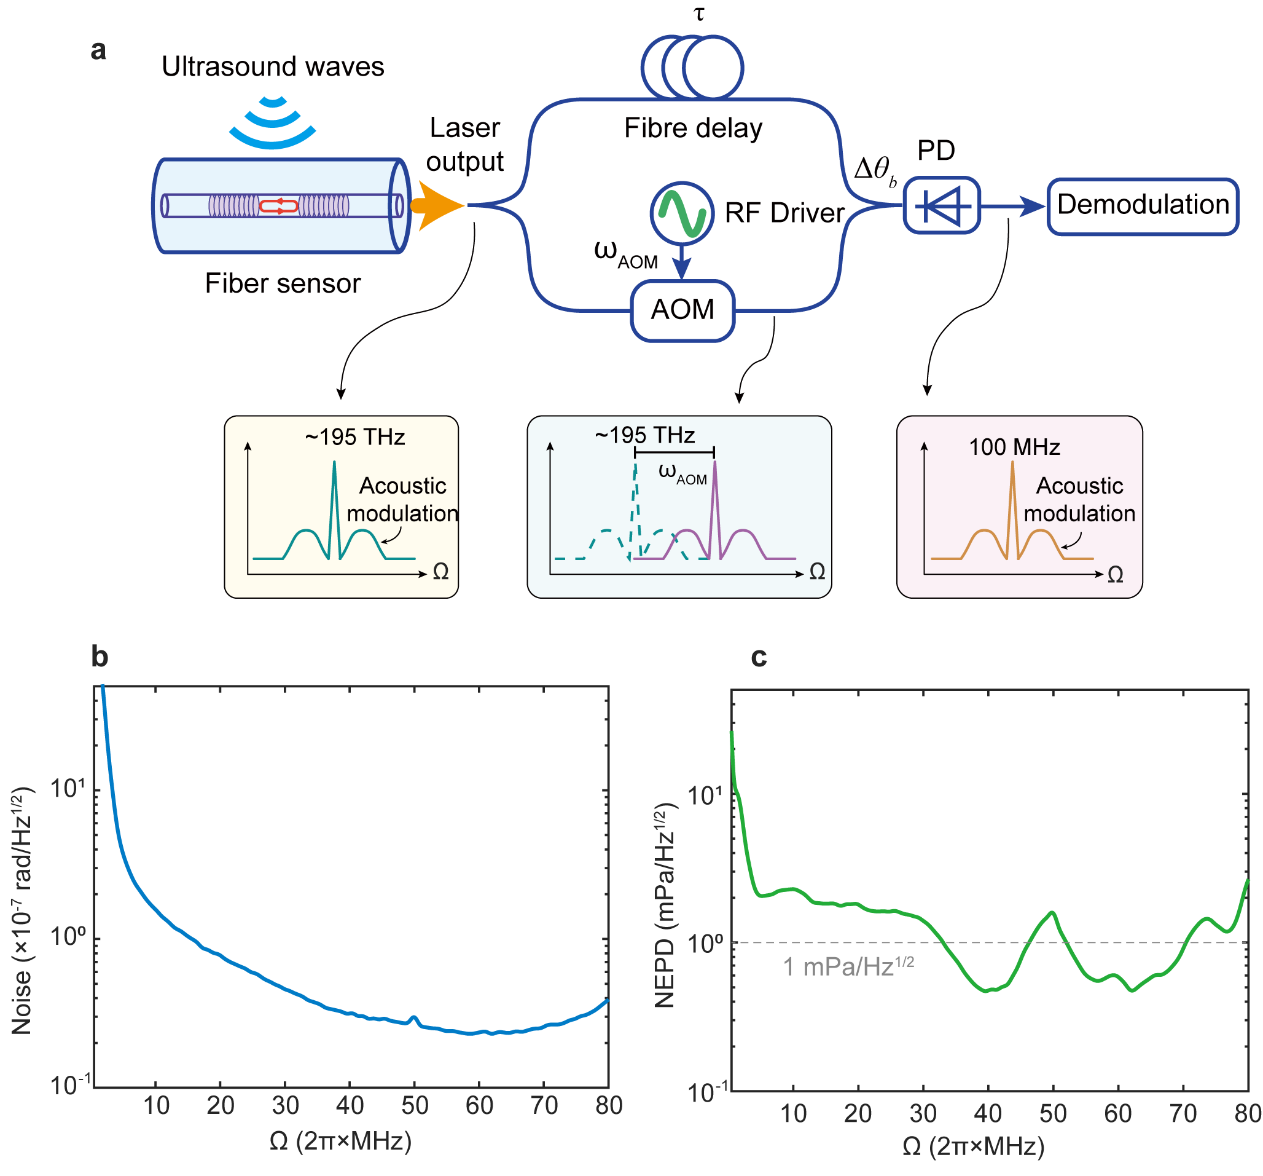


这个图

**Supplementary Figure S1.** Optical ultrasound sensor design and performance characterization. (a) Experimental setup. The sensor laser operates at a single frequency and single polarization ω0 with a 3-mm cavity confined by two photo-inscribed Bragg gratings in a rare-earth-doped fibre. The cavity is pumped by a 980-nm semiconductor laser through a wavelength-division multiplexer, followed by an erbium-doped fibre amplifier and an optical isolator for signal enhancement and feedback suppression. The sensor response is readout via a self-delayed heterodyne detection configuration. (b) System noise spectrum N(Ω). (c) Noise-equivalent pressure density (NEPD) spectra, showing an average NEPD of 1.5 mPa/Hz1/2 for high sensitivity of microvascular imaging applications.

**1b. Theoretical analysis and numerical simulation**

To validate the sensor performance, we developed a comprehensive theoretical model and compared it with experimental measurements. The acoustic susceptibility *S*m(*Ω*) was calculated using a two-dimensional finite-element model of an isotropic optical fibre (radius *r*cl=62.5 μm) oriented along the z-axis. Given that the fibre core radius (*r*co=4 μm) is significantly smaller than *r*cl, we approximated the probe light confinement at *r*=0. The simulation incorporated a 1-Pa planar ultrasound wave, with incident angles ranging from 0° to 360° (1° increments) and frequencies from 0 to 80 MHz (0.1 MHz steps).

The strain distribution and scattered wave pressure field were determined by applying continuity conditions for normal displacement and stress at the fibre boundary. The photoelastic effect induces optical path changes along two principal directions, described by [1]:

The sensor response exhibits two dominant vibrational modes: The breathing mode (60 MHz) generates isotropic strains (*S*m*,x* = *S*m,*y*), ensuring uniform optical response independent of ultrasound incidence angle *α*. The compressed mode (40 MHz) induces inversely related principal strains (*S*m*,x*=-*S*m,*y*), resulting in optical phase changes proportional to cos(2*α*) for both *x*- and *y*-polarized light. This dual-mode operation enhances *k*-space transfer function coverage, crucial for deep-tissue microvessel imaging.

The overall transfer function combines acoustic susceptibility and sensitivity gains from both laser cavity and heterodyne detection, expressed by. Figure S2a presents the calculated angular-dependent response function *R*(Ω, α), considering single-polarization operation. The frequency responses at *α*=0° are shown in Figure S2b. The temporal response, obtained through inverse Fourier transform of the frequency response, demonstrates excellent agreement with experimental measurements across various incident angles (Figure S2c).


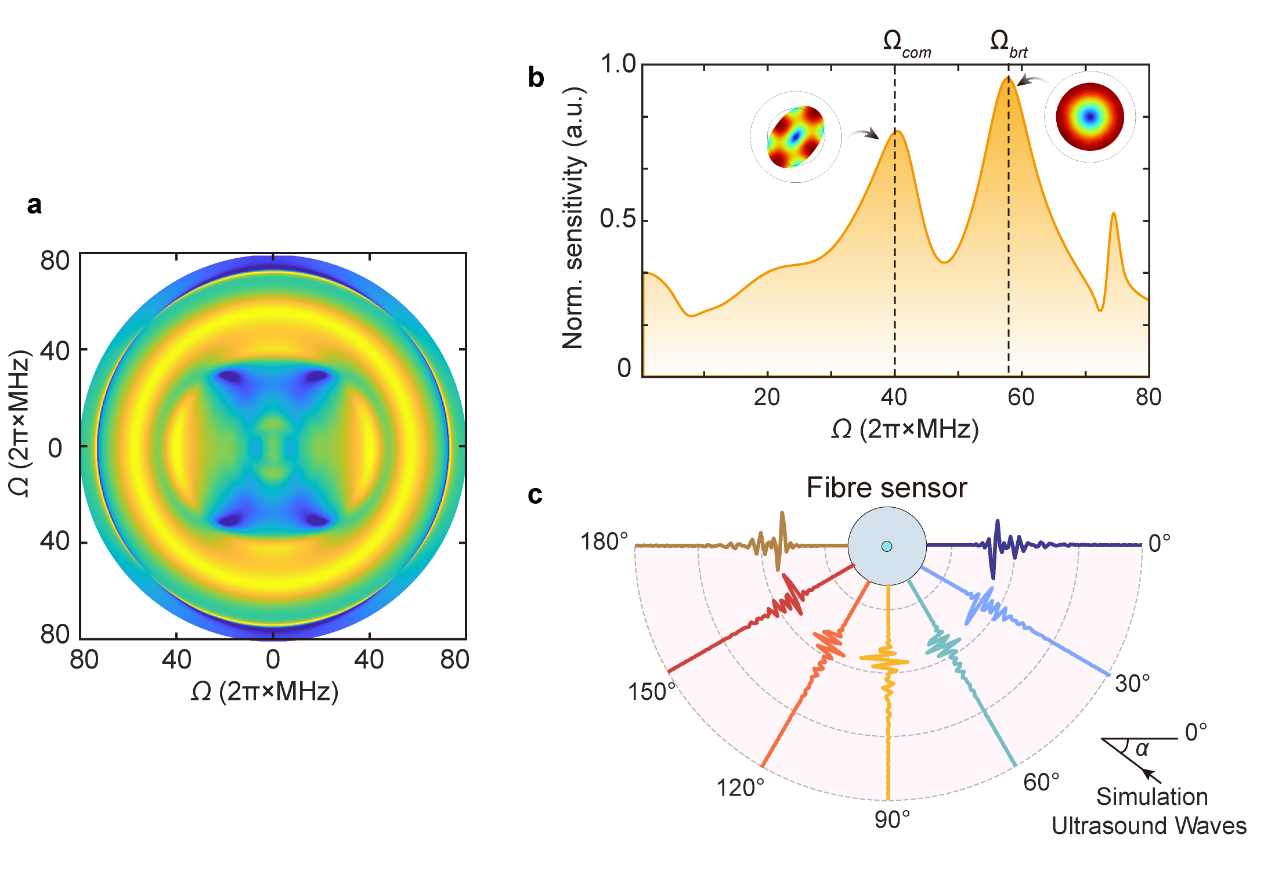


**Supplementary Figure S2.** Theoretical characterization of sensor response. (a) Angular-dependent frequency response map demonstrating omnidirectional detection capability. (b) Frequency response spectra at normal (0°) incidence, highlighting the contributions of breathing and compressed modes. (c) Calculated temporal responses at different incident angles, showing excellent agreement with experimental measurements.

**1c. Sensor array implementation**

To improve ultrasound detection efficiency and imaging speed in microvascular monitoring (as demonstrated in Figures 4), we designed and implemented an eight-element fibre-optic ultrasound sensor array system utilizing wavelength division multiplexing (Figure S3). Each sensor element operates at a distinct wavelength (1542.12-1547.72 nm with 0.8 nm channel spacing) corresponding to the communication channels of DWDM (Dense Wavelength Division Multiplexing), enabling parallel photoacoustic signal collection. The multiplexed signals undergo optical amplification via a customized erbium-doped fibre amplifier to achieve uniform channel power levels of approximately 23 dBm. The amplified signal is input into the self-delayed heterodyne module. After DWDM demultiplexing, the signals are connected to eight photodetectors for signal detection and collection through an 8-channel data acquisition module.

With current operational parameters (20 μm scanning step length, 2 mm scanning length per operation, 20 Hz laser repetition rate), the system achieves an imaging speed of 5 seconds per frame. This parallel acquisition approach significantly improves the temporal resolution compared to single-element sequential scanning, making it more suitable for monitoring dynamic vascular responses across different tissue depths during physiological activities.


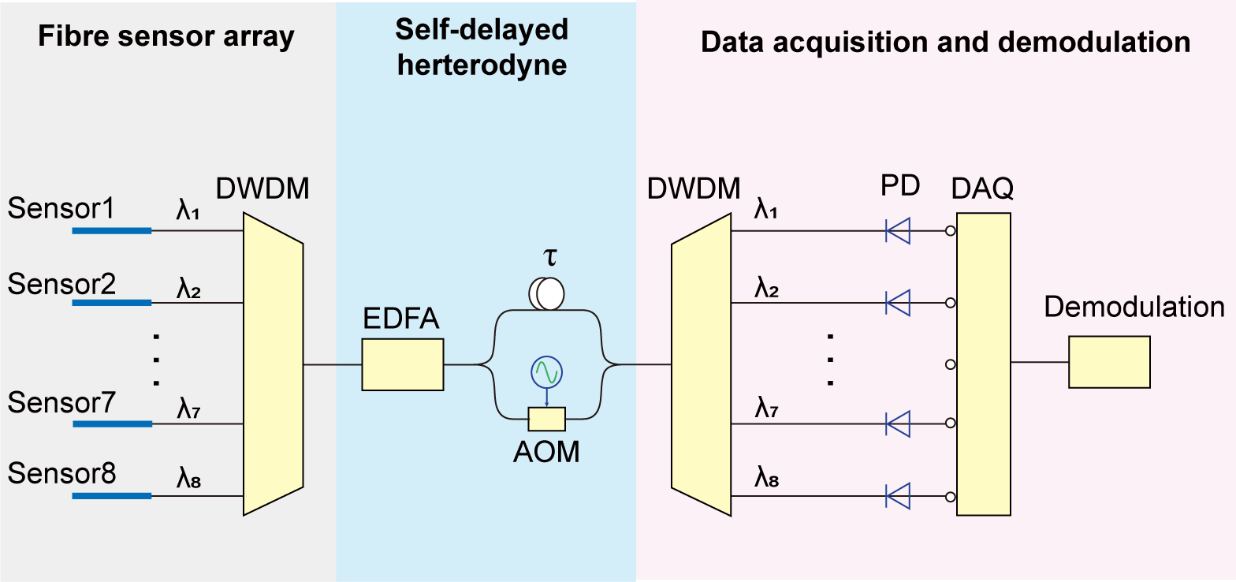


**Supplementary Figure S3. Eight-channel fibre-optic ultrasound sensor array system.** The system comprises three functional modules: an eight-element fibre sensor array operating at distinct wavelengths (λ1-λ8: 1542.12 - 1547.72 nm) coupled through dense wavelength division multiplexing (DWDM), a self-delayed heterodyne detection unit with optical amplification, and an 8-channel data acquisition module. DWDM: dense wavelength division multiplexing; AOM: amplitude optical modulator; EDFA: erbium-doped fiber amplifier; PD: photodetector; DAQ: data acquisition.

**Supplementary Note S2: Image reconstruction and processing**

**2a. Theoretical framework**

Photoacoustic imaging (PAI) aims to reconstruct optical absorption in biological tissues by restoring the initial acoustic pressure distribution. The propagation of the acoustic wave can be described in temporal and spatial frequency domains as follows [6, 7]:

where represents the Cartesian coordinates, and is the acoustic angular frequency. This formula describes how the original acoustic pressure propagates in free space.

In this study, the omnidirectional optical sensor acting as a line-integral detector along the *z*-direction, scanning over the *y*=0 plane to receive the acoustic wave. The relationship between the measured data and the initial acoustic pressure is given by:

Equation S9 indicates that if we know the pressure at the infinite y=0 plane and integrate along the z-direction for all times (*t* > 0). The integration along the z-direction reduces the problem to a two-dimensional reconstruction. For an ideal line sensor array of infinite length, we have the measured signal in frequency domains:

The integral along the z-direction is equivalent to selecting component, and measurement on the *y*=0 () plane is equivalent to integrating over in spatial domains. The term represents the cosine transformation in the temporal domain. Using the acoustic dispersion relation in tissue, we can map temporal frequencies to spatial frequency with . This interpolation allows us to recover two spatial dimensions from the recorded temporal domain signal as follows

Eventually, we restore the initial acoustic pressure field projection along the z-direction. To account for the limited reception angle and bandwidth of the sensor, we introduce the spatial-frequency response function of the sensor in, where denotes the acoustic frequency and ). Considering the limit due to the scanning range along the *x*-direction , where *lx* is the scanning range and else, we have:

The system's transfer function is given by:

Due to the spatially related properties of the function , the spatial response function (the spatial domain representation of the point spread function) of the photoacoustic imaging method is spatially variant.

**2b. Image reconstruction**

In this work, we employed MATLAB k-wave toolbox [8-10] to reconstruct all images. A dual speed-of-sound (SoS) reconstruction method was implemented by assigning different speeds of sound in biological tissue and surrounding water (as illustrated in Figure S4). The surface of the biological tissue was determined from the reconstructed image of the single SoS model (the black dotted line shown in Supplementary Figure S4a). The sound speeds were set as 1560 m/s for mouse brain, 1570 m/s for rat kidney, and 1580 m/s for human tissues.

The back-projection reconstruction was then repeated with the corrected sound speed profiles. The results of the single SoS method and the dual SoS method are shown in Figure S4b and S4c, respectively, demonstrating that the latter method can reduce imaging artifacts and result in better visualization of vessels situated perpendicular to the imaging plane. The selected vertical vessels (yellow circles) show improved clarity after applying the dual SoS model, with corresponding PA amplitude envelopes plotted in Figure S4d.


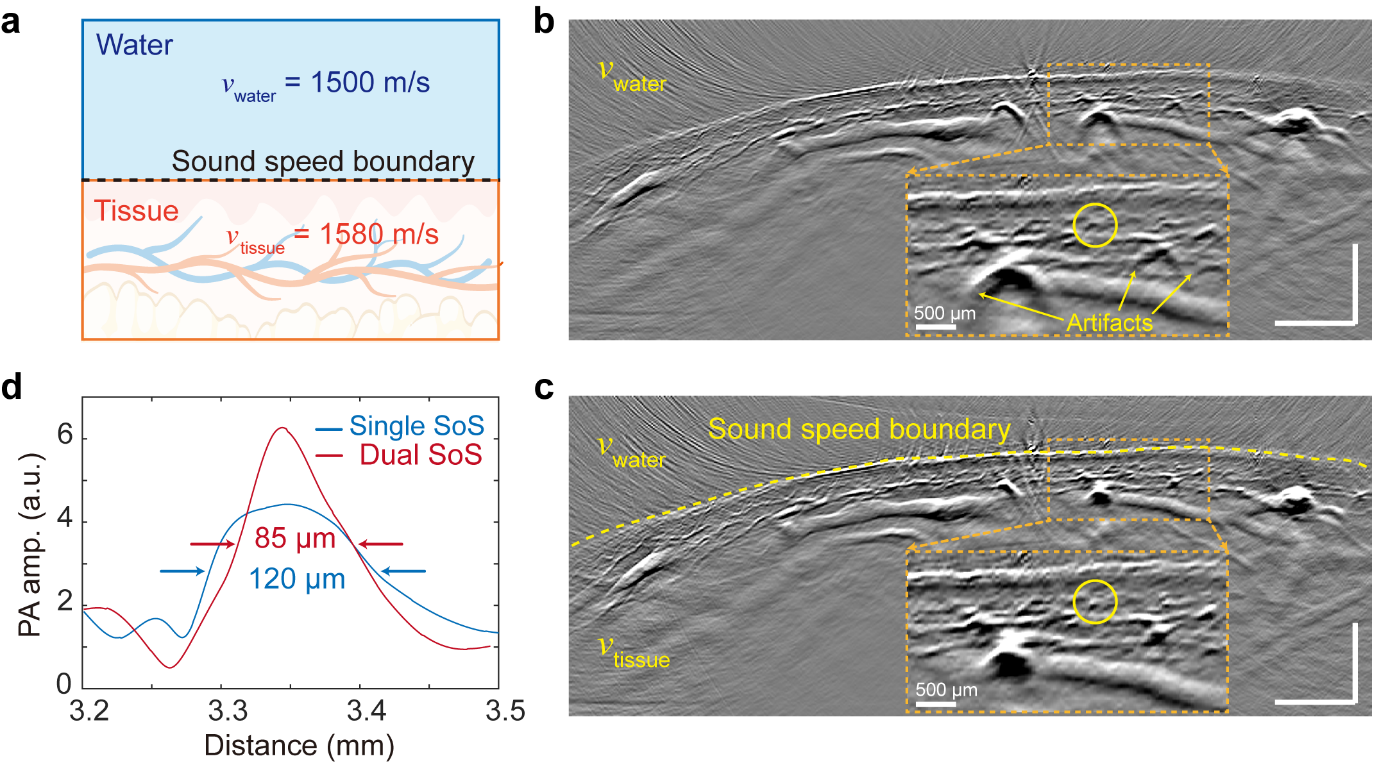


**Supplementary Figure S4. Dual speed-of-sound (SoS) reconstruction methodology for interface artifact reduction.** (a) Schematic illustration of the dual-SoS model incorporating water coupling medium (1500 m/s) and tissue (1580 m/s) regions. (b) Single-SoS reconstruction showing characteristic arc-shaped artifacts (yellow arrows and circle in inset) at tissue-water interface. (c) Dual-SoS reconstruction demonstrating significant reduction of interface artifacts while maintaining vessel clarity. Inset shows detailed comparison of the same region. (d) Quantitative analysis of vessel profile (indicated by yellow circles) showing improved resolution from 120 μm (single-SoS) to 85 μm (dual-SoS). Scale bars: 2 mm (main), 500 μm (insets).

Figure S5 illustrates the schematic of photoacoustic microvascular imaging achieved through linear scanning of an ultrasound transducer or a linear array of fibre sensors. The specimen is illuminated with wide-field pulsed laser light, and the induced ultrasound waves are detected by the scanning sensor. Conventional piezoelectric sensors are limited by their narrow reception angle (top left), which results in the detection of only a portion of the ultrasound waves. In microvascular imaging, blood vessels oriented obliquely generate ultrasound waves at small angles relative to the surface of the specimen. Due to the narrow angular coverage of the spatial-frequency response function *R*(*Ω*, *α*) of traditional sensors, these waves (represented by dashed arrows) are difficult to detect and therefore are not visible in the reconstructed image (bottom left).

In contrast, the omnidirectional optical sensor can detect ultrasound waves over a wide range of angles (top right), capturing a more complete spatial spectrum. This capability enables panoramic photoacoustic imaging, as shown in the bottom right of Figure S5. The improved angular coverage directly contributes to better image quality, particularly for complex vascular networks with vessels oriented in various directions.


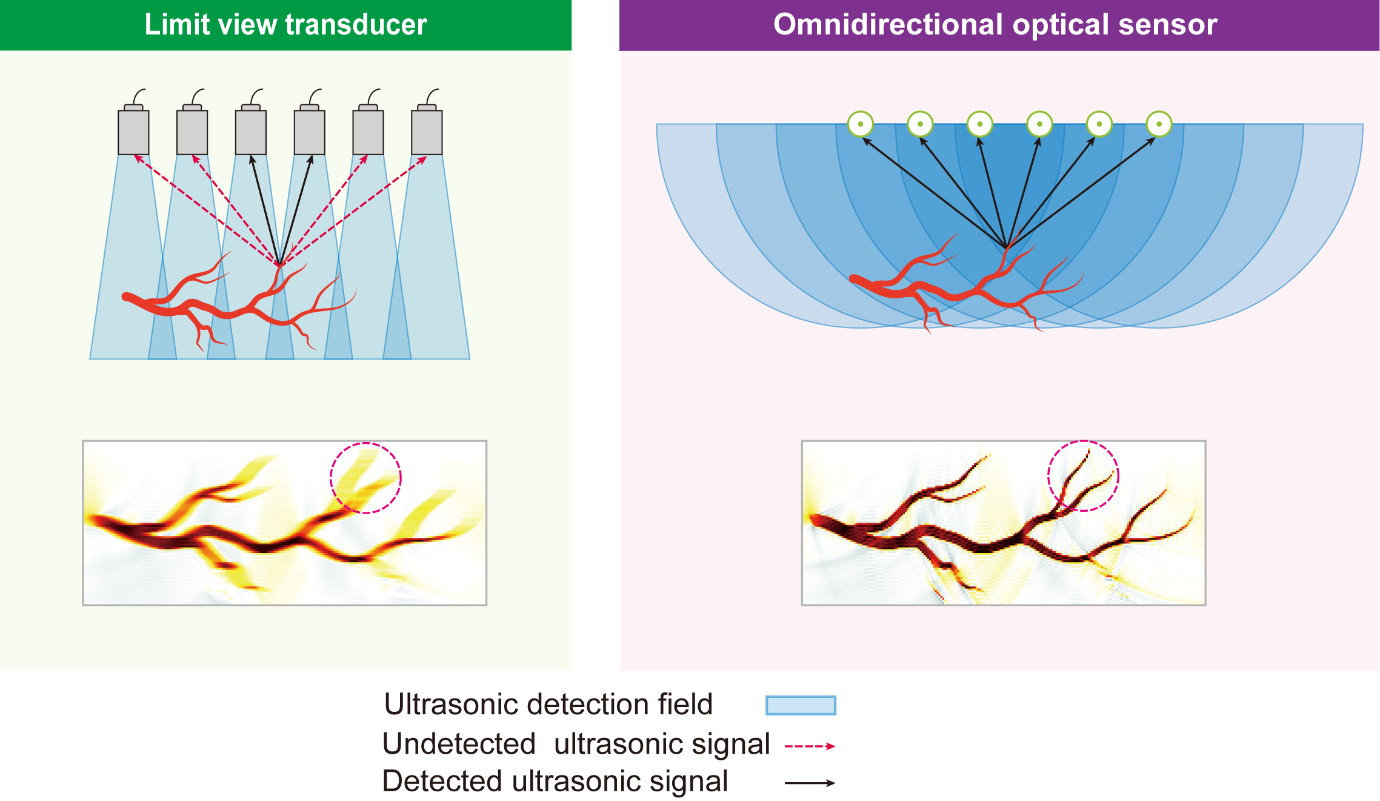


**Supplementary Figure S5. Effect of detection angular coverage on image quality.** Schematic comparison between conventional limited-view transducer and omnidirectional optical sensor for microvascular imaging. Top: Detection geometry and ultrasonic field coverage illustration. Solid black arrows indicate detected signals while dashed red arrows represent undetected signals due to directional limitations. Bottom: Reconstructed image quality comparison demonstrating superior vessel visualization and reduced artifacts with omnidirectional detection (highlighted regions in red circles)**.**

**2c. Post-processing pipeline**

Our image processing pipeline consists of multiple stages designed to enhance vascular visualization and enable quantitative analysis. The complete workflow is illustrated in Figure S6.

*Image Enhancement*

The raw reconstructed images first undergo depth-dependent compensation to account for light attenuation and acoustic wave propagation losses. This step ensures consistent visibility of vessels across different depths. For human skin imaging applications, we implement a surface flattening algorithm to correct for surface curvature, facilitating more accurate vessel depth measurements.

Following the initial compensation, we apply contrast enhancement techniques to improve image quality. A key component of our pipeline is the Hessian-based Frangi vesselness filtering [11, 12], which specifically enhances tubular structures while suppressing background noise. This multi-scale vessel enhancement approach is particularly effective for visualizing complex vascular networks with varying vessel diameters.

*Multi-modal Visualization*

Our system implements several complementary encoding schemes to maximize the information content of the final images (See Figures 2 to 5):

(a) Frequency encoding separates signals into two bands (0-30 MHz and 30-80 MHz), enabling differentiation between vessels of different sizes

(b) Depth encoding employs a red-to-green color transition to represent vessel depth

(c) Dual-wavelength (532/1064 nm) information is merged to provide spectroscopic contrast

(d) Angular encoding reflects the vessel orientation information

These encoding schemes can be applied individually or in combination depending on the specific analysis requirements.

*Statistical Analysis*

For quantitative assessment, we generate spatiotemporal heat maps to analyze dynamic changes in the vascular network. PA amplitude calculations are performed on reconstructed images to ensure accurate signal representation. Vessel diameter measurements are conducted using the full-width-at-half-maximum (FWHM) method on the reconstructed images, with multiple measurements taken along each vessel segment of interest for statistical reliability.

The spectral analysis introduces the S-factor, which characterizes the oxygenation state of blood vessels by examining the spectral differences between measurements at different wavelengths. This parameter provides crucial information about tissue oxygen metabolism and hemodynamic responses during physiological challenges. The quantitative analysis is performed using custom MATLAB scripts that maintain consistency across different datasets, enabling reliable comparison of vascular responses under various conditions.


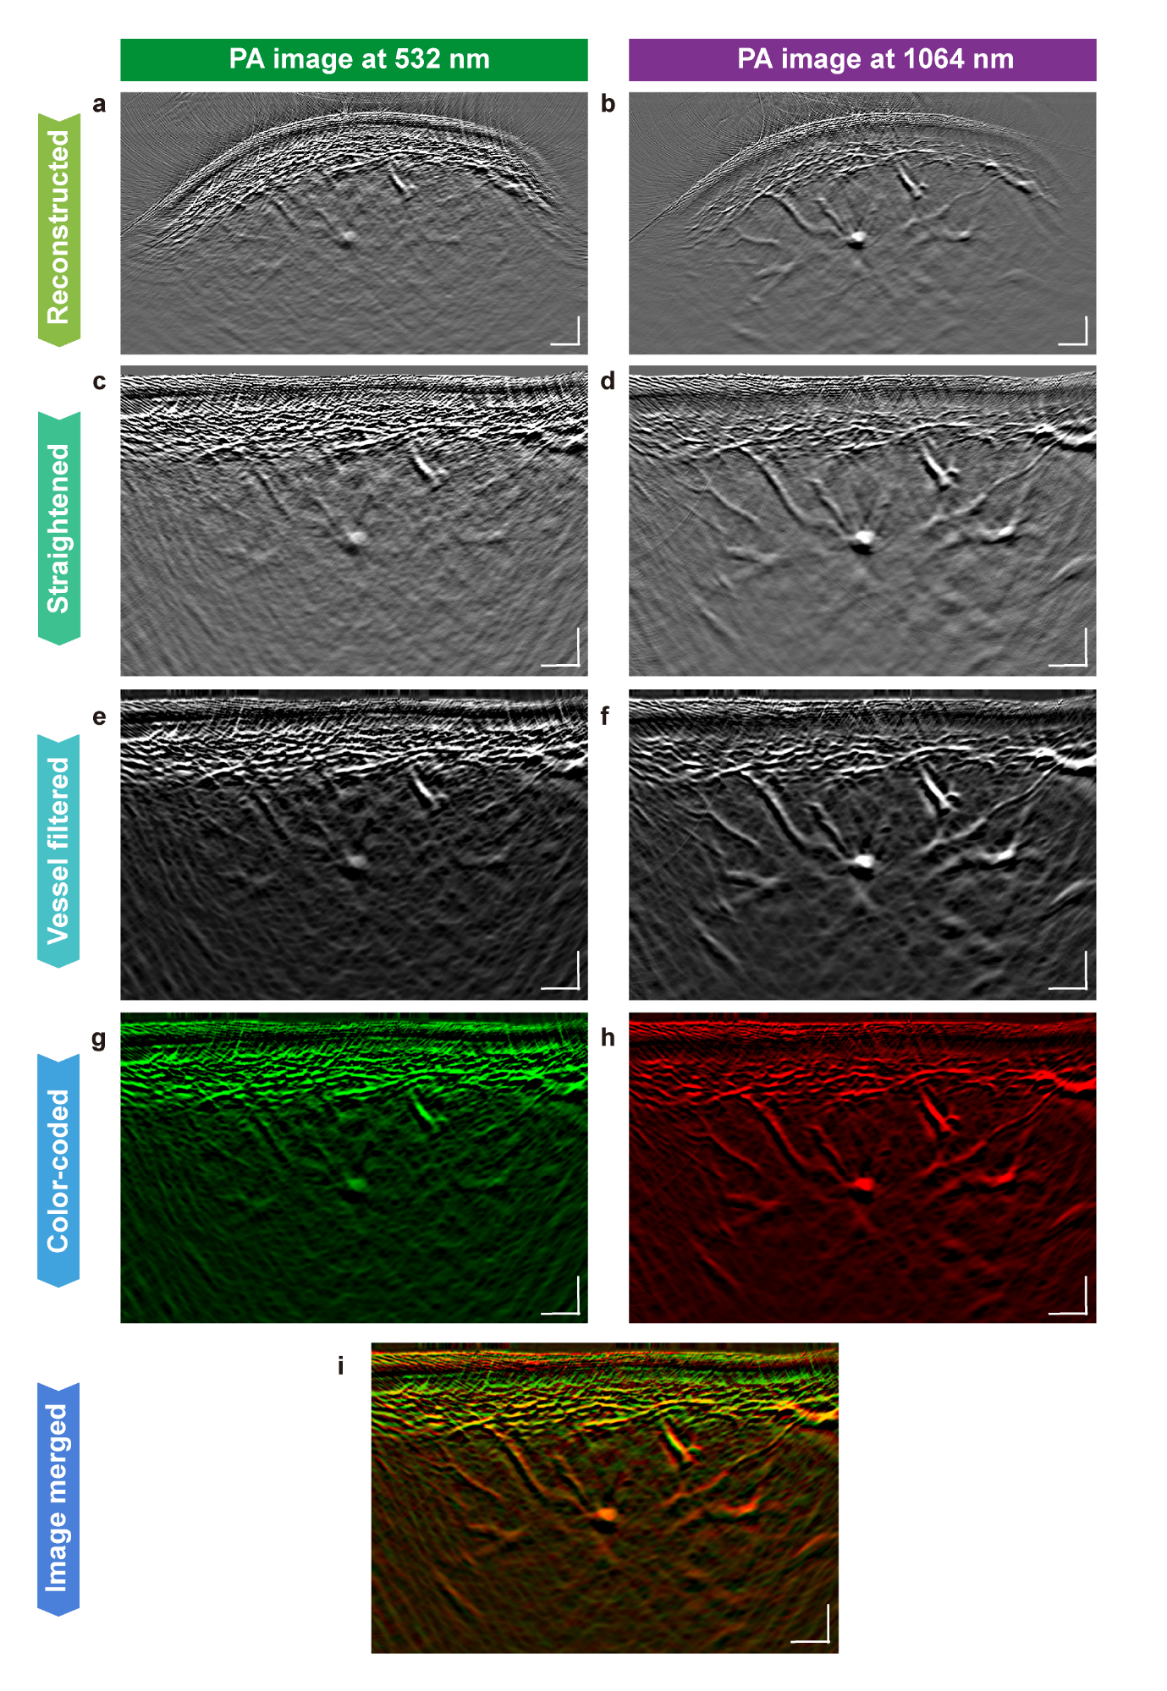


**Supplementary Figure S6. Reconstructed images and enhancement pipeline for dual-wavelength photoacoustic imaging.** (a, b) Initial back projection reconstructed images at 532 nm and 1064 nm wavelengths showing raw vascular structures. (c, d) Surface-flattened and contrast-enhanced images after adaptive histogram equalization and depth-dependent signal compensation. (e, f) Vessel-enhanced images after applying multi-scale Hessian-based Frangi filtering optimized for tubular structure detection. (g, h) Spectrally-encoded visualization with 532 nm (green) and 1064 nm (red) channels highlighting different vascular features. (i) Dual-wavelength merged image enabling simultaneous visualization of superficial (green) and deep (red) vascular networks. Scale bar: 1 mm.

**Supplementary Note S3: Experimental validation**

**3a. Phantom imaging**

Black-dyed microspheres (10 μm diameter) were employed to assess the spatial resolution of the system. The uniform distribution of microspheres within the agar gel enables calibration of resolution at multiple depths. Following image acquisition of the microspheres, we analyzed particles located at depth ranging from 1 mm to 15 mm relative to the fibre sensor surface (corresponding to Figure 1c in the main text). A representative microsphere at a depth of 1.2 mm is shown in Figure S7a. Analysis of this microsphere yielded lateral and axial resolutions of 33 µm and 40 µm, respectively, demonstrating the high spatial resolution of the MOBILE system.


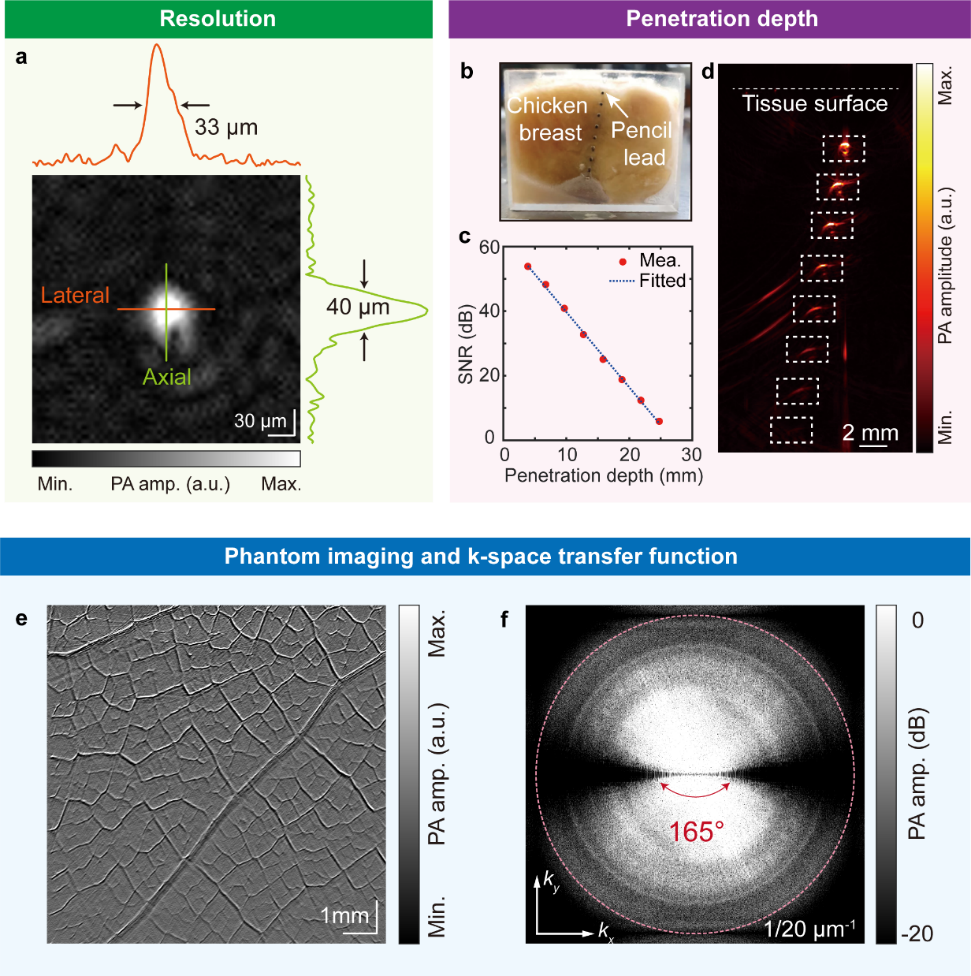


**Supplementary Figure S7. Phantom imaging results.** (a) Point spread function analysis of a 10-μm microsphere at 1.2 mm depth, demonstrating lateral and axial resolutions of 33 μm and 40 μm respectively. (b) The photo of eight pencil graphite in chicken breast and (d) its photoacoustic reconstruction images. (c) The relationship between penetration depth and SNR of pencil graphite. (e) Photoacoustic reconstruction images of leaf veins and (f) its two-dimensional Fourier transform spectrum, which represents the acceptance angle up to 165 degrees.

Eight pencil graphite with diameter of 100 μm (simulating blood vessels) were embedded in chicken breast tissue to evaluate the imaging depth capability of the MOBILE’s system. As illustrated in Figure S7b, the biological phantom was prepared using a custom-designed 3D-printed holder that maintained parallel alignment of the pencil graphite within the fresh tissue matrix. Photoacoustic excitation was achieved through 1064 nm laser irradiation at a controlled fluence of 12 mJ/cm². The reconstructed tomographic image in Figure S7d clearly resolves the embedded graphite structures, with subsequent quantitative analysis of their photoacoustic signals establishing depth-dependent performance metrics. Figure S7c demonstrates the derived depth-SNR correlation, revealing that the system maintains a SNR above 10 dB at the maximum penetration depth of 25 mm.

To validate the multi-angle imaging performance of the MOBILE’s system, dehydrated leaf veins infused with black ink were employed as biological phantoms. A 532 nm excitation laser delivering a controlled fluence of 6.5 mJ/cm² uniformly irradiated the agar-embedded leaf specimens. Supplementary Figure S7e demonstrates the photoacoustic reconstruction of the vascular network, with the corresponding two-dimensional Fourier transform spectrum in k-space presented in FigureS7f. The angular measurement denoted by the red arrow confirms up to 165°, while the pink circular marker identifies the maximum peak resonance bandwidth at 1/20 μm⁻¹.

**3b. Small animal imaging**


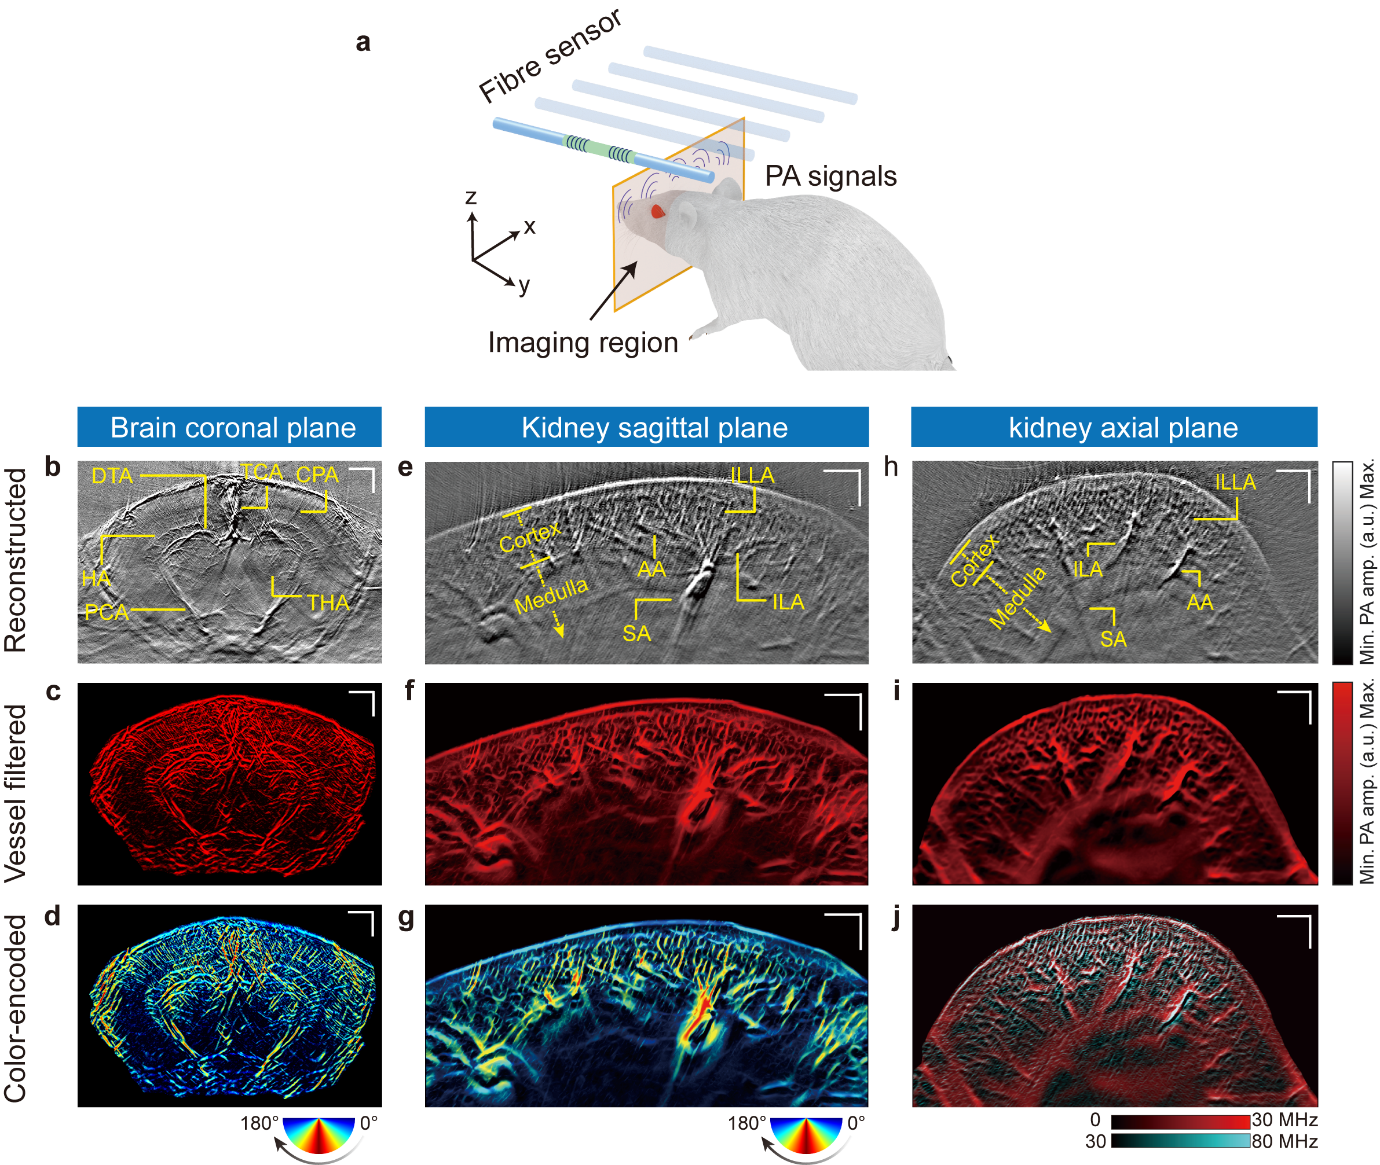


**Supplementary Figure S8. Mouse brain and rat kidney imaging results.** (a) Linear scanning of mouse organ using the omnidirectional fibre optic sensor. (b-d) Mouse brain coronal section imaging: (b) Raw photoacoustic reconstruction, (c) Vessel-enhanced visualization after adaptive filtering, and (d) Directional analysis through angle-encoded mapping. (e-g) Rat kidney sagittal section imaging: (e) Original photoacoustic reconstruction, (f) Vessel-enhanced visualization, and (g) Vessel orientation analysis. (h-j) Rat kidney axial section imaging demonstrating: (h) Initial photoacoustic reconstruction, (i) Enhanced vascular contrast, and (j) Spatial frequency distribution analysis. Scale bars: 1 mm.

Supplementary Figure S8 presents multi-modal visualization of rodent mouse brain and kidney vasculature through the MOBILE system. Figure S8a illustrates the linear scanning configuration of fibre sensor with moving orientation aligned to the imaging plane. Reconstructed images of mouse brain coronal (Figure S8b), Rat kidney sagittal (Figure S8e) and axial (Figure S8h) planes reveal high-resolution intricate microvascular networks, validating the system's capillary-scale resolving power (<100 μm). Post-processing sequences demonstrate: contrast enhancement image after vessel filtering (Figure S8c, f, i), angel-encoded image (Figure S8d, g), and multi-frequency encoded image (Figure S8g), achieving high concordance with histological validation in vessel density quantification.

**3c. Human subject imaging**

The MOBILE system's versatility in human imaging applications is demonstrated through its adaptable sensor configurations and comprehensive vascular visualization capabilities. Our miniaturized fibre-optic ultrasound sensors can be configured in multiple arrangements to optimize imaging performance for specific clinical scenarios. As shown in Supplementary Figure S9, for quantitative hemodynamic monitoring (such as venous occlusion studies, Figures 3 and 4 in the main text), we employed a parallel array of eight fibre sensors. This configuration enables rapid, synchronized data acquisition while maintaining high spatial resolution across the imaging field.


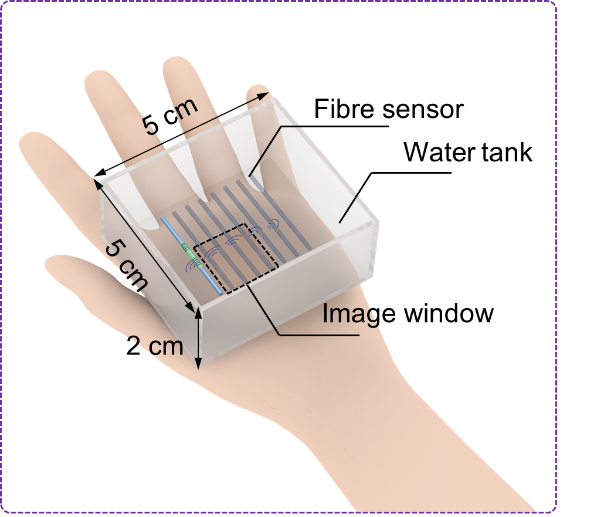


**Supplementary Figure S9. Experimental setup for venous occlusion monitoring using integrated multi-sensor array.** (a) Design of the fibre-optic sensor array integration, featuring eight parallel ultrasound sensors mounted in a precision-machined clamp structure. This configuration enables simultaneous multi-point detection for efficient hemodynamic monitoring, as demonstrated in the main text (Figures 3 and 4).

To validate the system's imaging capabilities across different anatomical sites, we conducted comprehensive imaging studies on multiple volunteers (n=9, age around 24 years, including both males and females) under standardized conditions. Supplementary Figure S10 demonstrates the system's ability to visualize vascular networks at various depths and scales. In palm tissue imaging, we achieved consistent visualization up to 1 cm depth with a field of view of 3 cm (Figure S10a), while simultaneously resolving microvascular structures as small as 40 μm in diameter (Figure S10b). The system maintained this high-quality imaging performance across different anatomical locations, as evidenced by clear visualization of vascular networks in both wrist and arm regions (Figure S10c, d).


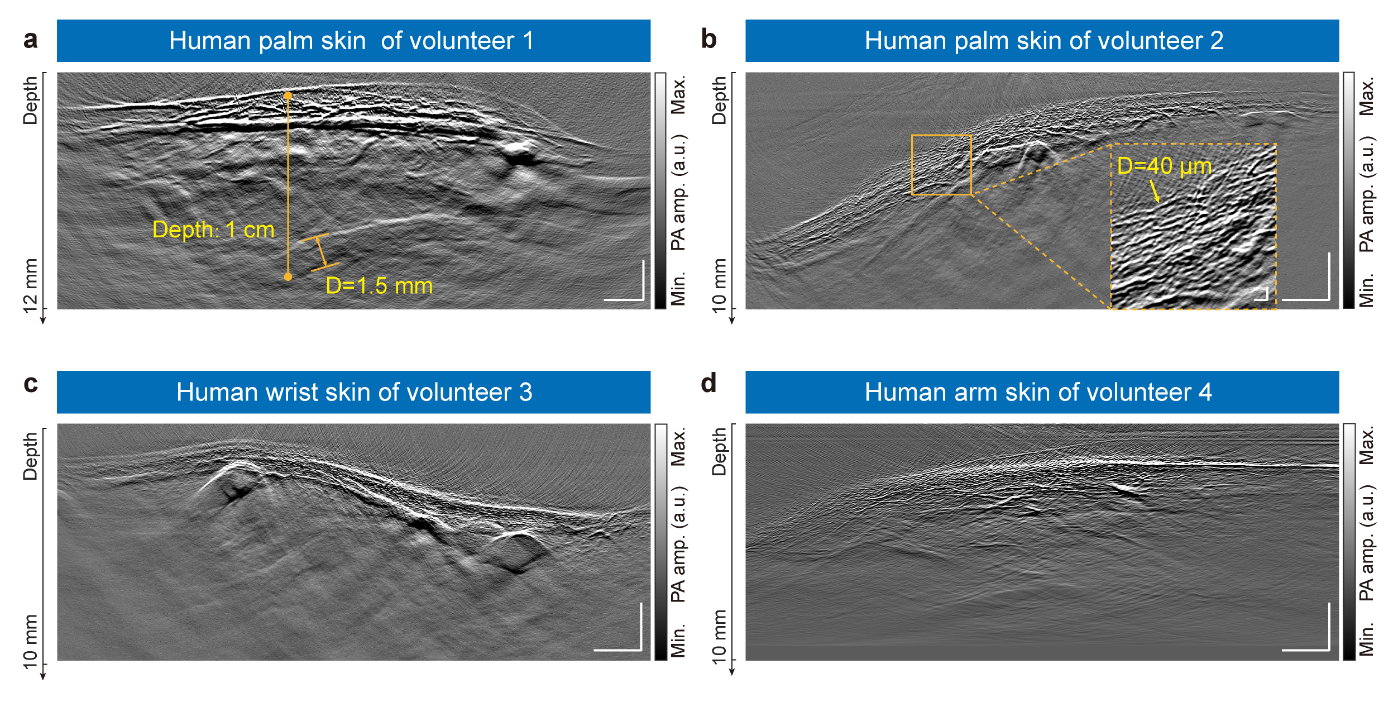


**Supplementary Figure S10. In vivo photoacoustic imaging of human peripheral vasculature across multiple anatomical sites.** (a) Deep-tissue palm vasculature imaging demonstrating penetration depth of 1 cm and lateral coverage of 3 cm. (b) High-resolution visualization of palm microvasculature, with magnified region (inset) showing distinct vessel structures down to 40 μm in diameter. (c) Wrist vasculature imaging showing complex vascular networks with clear vessel branching patterns. (d) Upper arm vascular mapping demonstrating consistent imaging quality at varied tissue depths. Scale bars: 2 mm (200 µm for inset).

To validate the MOBILE system's capability for dynamic hemodynamic monitoring, we conducted comprehensive vascular challenge studies in healthy volunteers (n=4, age around 24 years, including both males and females). The depth-resolved quantitative analysis of these interventions (corresponding to Figure 4 in main text) is presented in Supplementary Figure S11, revealing distinct hemodynamic patterns across different skin layers. During venous occlusion, we observed layer-specific changes in both photoacoustic amplitude and oxygen saturation (Figure S11a-b), reflecting the differential vascular responses in superficial and deep tissue layers. Similarly, thermal stimulation induced characteristic changes in vascular parameters (Figure S11c-d), with notable variations in the temporal evolution of responses across different tissue depths.

These supplementary analyses provide additional validation of our findings presented in the main text, highlighting the MOBILE system's capability to capture complex, layer-specific hemodynamic responses during physiological challenges. The consistent performance across multiple subjects demonstrates the reproducibility of our measurement approach and its potential for studying microcirculatory dynamics in various clinical applications.


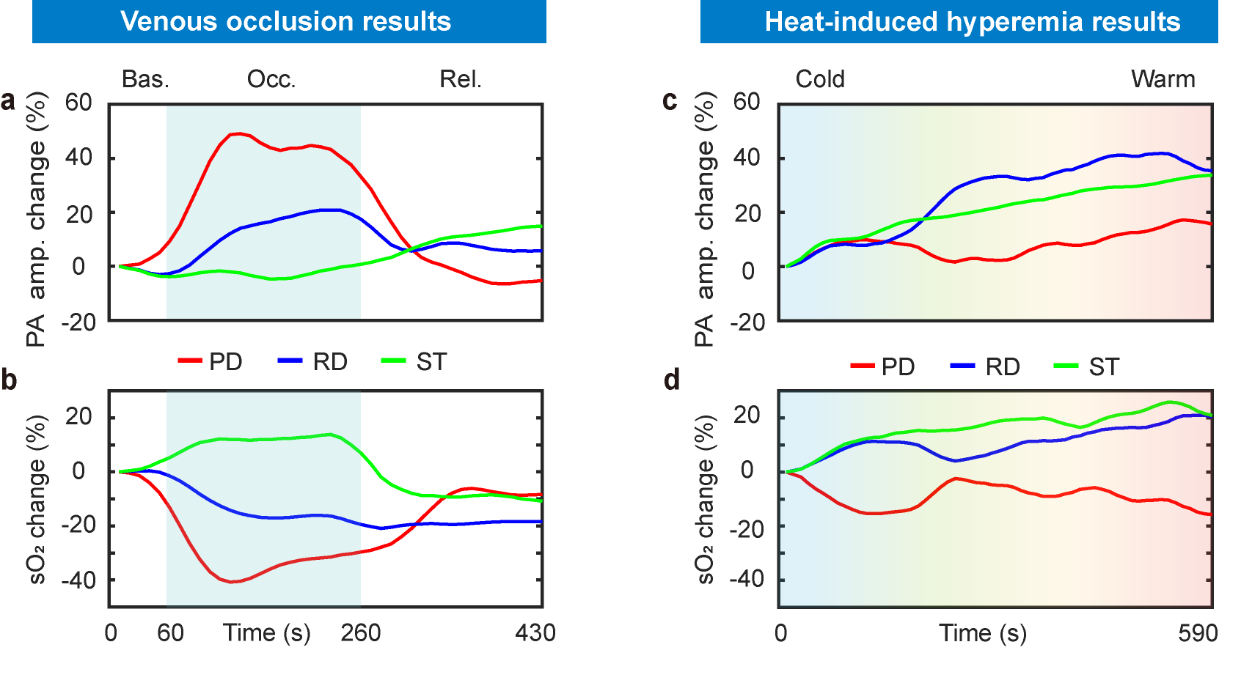


**Supplementary Figure S11. Layer-specific hemodynamic responses during vascular challenges.** (a-b) Venous occlusion induced changes: Photoacoustic amplitude and sO2 variations in papillary dermis (PD), reticular dermis (RD), and subcutaneous tissue (ST). (c-d) Heat-induced photoacoustic amplitude and sO2 variations. All measurements are presented as percentage changes relative to baseline values. These quantitative analyses correspond to the imaging data presented in Figure 4 of the main text.

**Supplementary Note S4: Dynamic imaging on exercise subjects**

**4a. Integration of rotational scanning probe for exercise monitoring**

Supplementary Figure S12 illustrates our specialized probe design optimized for exercise-based microcirculatory monitoring. The rotational scanning mechanism, featuring a motorized fibre-optic sensor integrated within an ergonomic imaging probe, was specifically engineered to maintain stable contact and reliable measurements during dynamic exercise conditions. The probe's compact design allows seamless integration with exercise equipment, as demonstrated by its incorporation into the spin bike handlebar (Figure S12).

The rotating motor drives precise circular scanning of the fibre sensor, while the carefully designed probe shell and reflector arrangement ensure consistent acoustic coupling and signal collection. This configuration enables continuous monitoring of vascular dynamics without interference from motion artifacts - a critical requirement for exercise studies. The optical transmission bundle maintains efficient light delivery throughout the rotational scanning process, supporting reliable photoacoustic signal generation even during vigorous exercise. Detailed specifications of the scanning parameters and probe characteristics are provided in the Methods section.

This optimized integration of optical and mechanical components exemplifies how our MOBILE system can be adapted for specialized monitoring scenarios while maintaining high-quality imaging performance. The success of this design is evidenced by the stable microvascular imaging achieved during both free-motion exercises and cycling protocols, as demonstrated in subsequent figures.


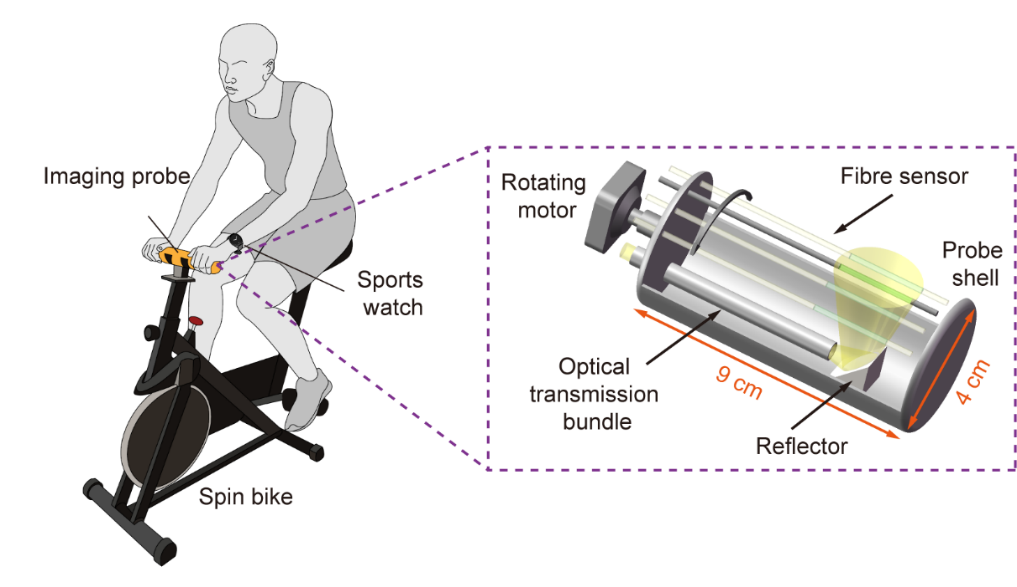


**Supplementary Figure S12. Design and implementation of rotational scanning probes in the MOBILE system.** This design incorporates a motorized probe for circular scanning, with detailed schematic showing key components: fibre-optic sensor, rotating motor, optical transmission bundle, reflector, and ergonomic probe shell designed for integration with exercise equipment.

**4b. Dynamic monitoring of exercise-induced microvascular responses**

To validate the MOBILE system's capability for exercise monitoring, we conducted comprehensive studies with multiple volunteers under two distinct protocols: free-motion squat exercise and stationary cycling (Figure S13). The experimental setup was meticulously designed to ensure stable contact between the probe and tissue, while simultaneously allowing for natural movement patterns (see Figure S13a). Photoacoustic images were continuously acquired to monitor the dynamics of microvasculature throughout the exercise protocols. Two typical bipolar reconstructed images of microvessels corresponding to the main text (Figure 5) are provided in Figure S13b, which clearly illustrate the changes induced by exercise. Additionally, the corresponding Gaussian fitting and quantified diameter changes are shown in Figures S13c and S13d. Despite some artifacts caused by motion, the system successfully captured the dynamic vascular responses with adequate temporal and spatial resolution.


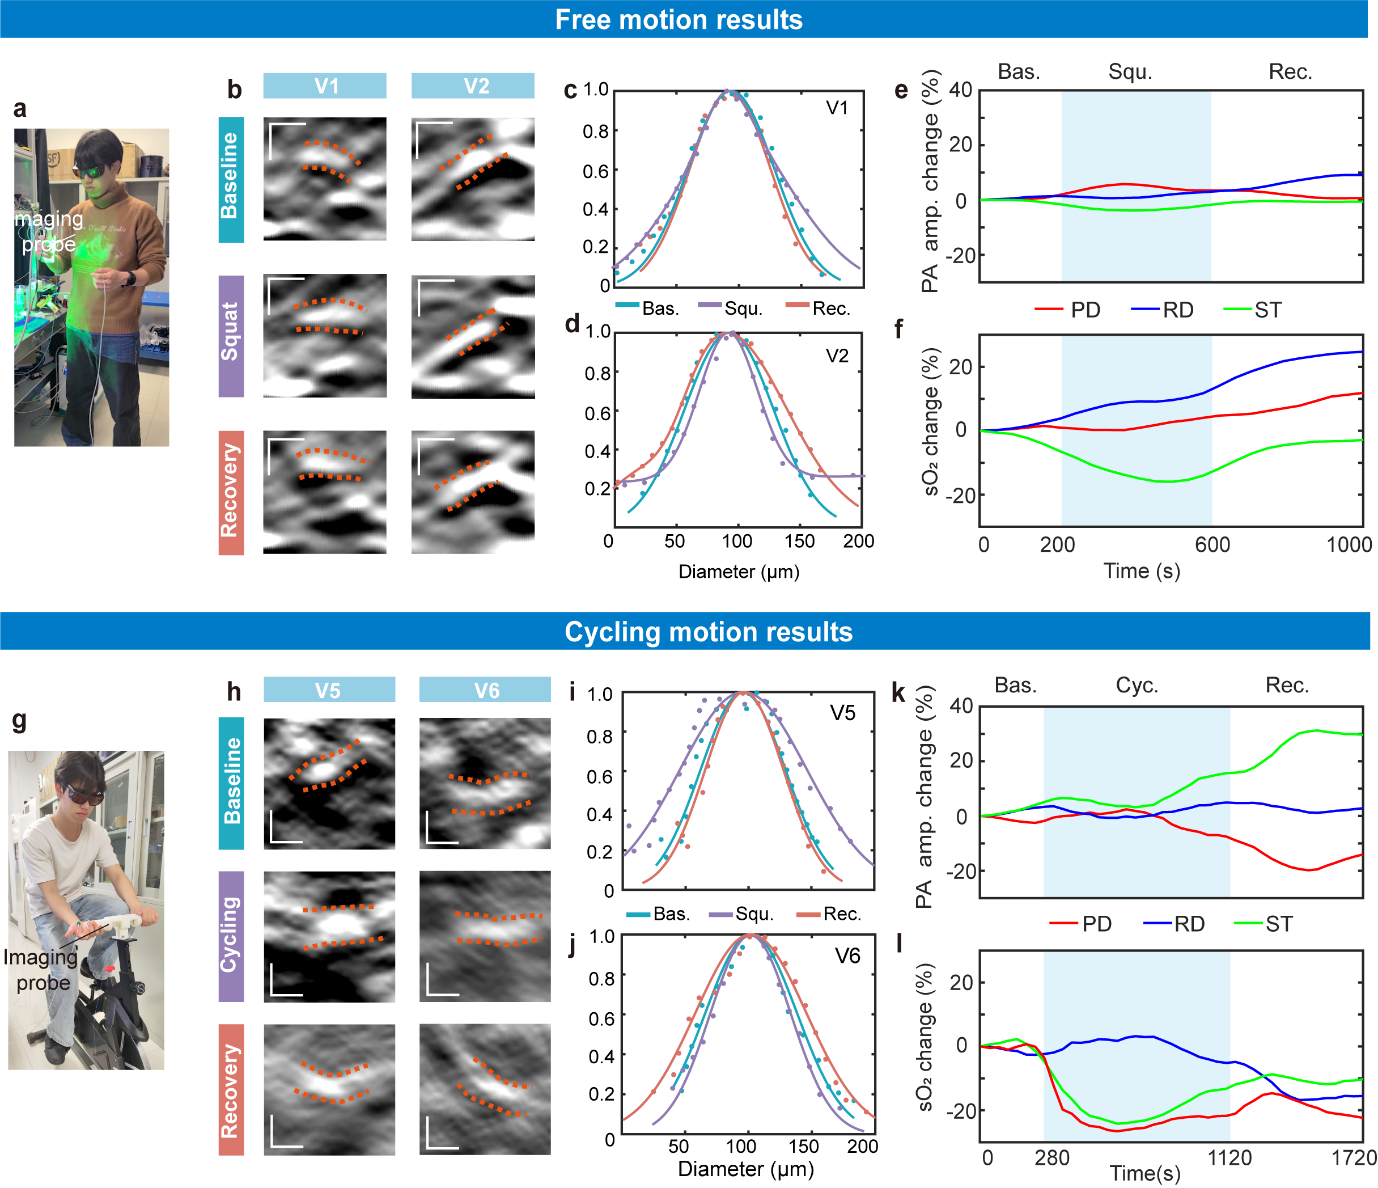


**Supplementary Figure S13. Dynamic photoacoustic imaging during different exercise protocols.** (a, g) Photographs demonstrating probe positioning during free-motion exercise and stationary cycling, respectively. (b, h) Representative photoacoustic images in Fig.5 showing microvascular responses during free-motion exercise and stationary cycling, respectively. Scale bar: 100 μm. (c, d, i, j) The changes in the diameter of micro vessels. (e, k) Photoacoustic amplitude changes across papillary dermis (PD), reticular dermis (RD), and subcutaneous tissue (ST). (f, l) Layer-specific oxygen saturation (sO2) dynamics.

The cycling exercise protocol (Figure S13g) effectively demonstrated the system's robustness in monitoring more intensive physical activities. Time-resolved imaging captured at baseline (t = 40 s), during active cycling (t = 880 s), and throughout the recovery phase (t = 1600 s) revealed distinct exercise-specific patterns of microvascular adaptation (Figure S13h). Corresponding Gaussian fitting and quantified diameter changes are also shown in Figures S13i and S13j. The consistency of image quality across these different time points further validates our probe design and motion compensation strategies.

Quantitative analysis of these datasets (Supplementary Figure S13) provided deeper insights into layer-specific hemodynamic responses. The photoacoustic amplitude changes in different skin layers - papillary dermis (PD), reticular dermis (RD), and subcutaneous tissue (ST) - showed distinct temporal evolution patterns during both exercise protocols (Figure S13e, k). Notably, the layer-specific oxygen saturation (sO2) dynamics (Figure S13f, l) revealed differential responses across tissue depths, suggesting complex regulatory mechanisms in exercise-induced vascular adaptation. These findings highlight the importance of multi-parameter monitoring in understanding exercise-induced microcirculatory responses.

**Supplementary Note S5: Comparative analysis**

## 5a. Comparative analysis with current imaging modalities

To comprehensively evaluate the performance advantages of our MOBILE system, we conducted systematic comparisons with two widely-adopted brain imaging modalities: high-field magnetic resonance angiography (MRA) and commercial photoacoustic-ultrasound array imaging. The comparative results, presented in Supplementary Figure S14, demonstrate the distinct capabilities of each imaging approach in visualizing cerebral vascular structures.

For the high-resolution MRA experiments, we employed a 9.4 T BioSpec 94/30 system (Bruker) featuring an advanced gradient system capable of 400 mT/m maximum strength with 80 μs rise time. The imaging protocol was carefully optimized using a dual-function 1H volume coil operating at 400.31 MHz, with the anesthetized mouse positioned prone for stable data acquisition. We configured the system with a 14×14×14 mm³ field of view and 256×256×128 matrix size, utilizing timing parameters of TR/TE = 25/4.4 ms and a flip angle of 25°. The twenty-minute acquisition generated high-quality three-dimensional datasets, which were subsequently processed using RadiAnt DICOM viewer to produce maximum intensity projections with 2 mm layer thickness, as shown in Figure S14b.

Parallel comparative imaging was performed using a Vevo LAZR-X @3100 system (VisualSonics Inc.). The experimental setup featured dual planar laser beams operating at 900 nm wavelength, delivering 15-20 mJ/cm² light intensity to the exposed brain tissue following craniotomy. An MX400 ultrasound linear array transducer with 0-30 MHz bandwidth captured the photoacoustic signals, producing the imaging results displayed in Figure S14c.

The raw photoacoustic imaging data from our MOBILE system, shown in Figure S14a, represents the unprocessed results prior to contrast enhancement or vessel filtering procedures. The k-space transfer functions displayed in the lower panel of Figure S14 provide crucial insights into the fundamental imaging capabilities of each system. Our omnidirectional optical acoustic sensor demonstrates significantly broader angular coverage compared to the commercial linear array, enabling more comprehensive vascular mapping across diverse vessel orientations. The extended spatial frequency response of our system facilitates superior resolution of blood vessels across different diameter scales, particularly beneficial for detailed microvascular imaging.

The comparative analysis reveals several key advantages of our MOBILE system. First, the omnidirectional detection scheme ensures uniform sensitivity to vessels oriented in any direction, overcoming the angular limitations inherent in conventional linear arrays. Second, the broader transfer function spectrum indicates enhanced capability in resolving fine vascular structures while maintaining excellent imaging depth. Finally, the system achieves these advantages while supporting real-time imaging capabilities, making it particularly suitable for dynamic vascular monitoring applications. These results validate our technical approach and demonstrate the potential impact of our system in advancing preclinical brain imaging research.


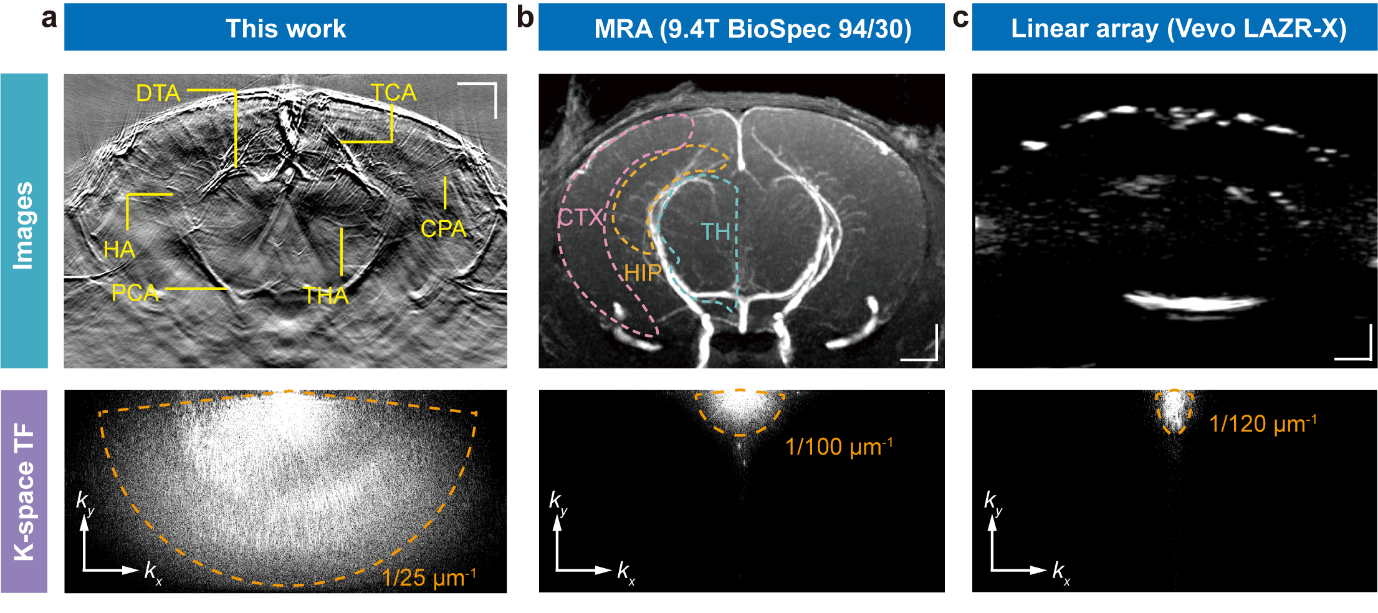
**Supplementary Figure S14. Comparative evaluation of brain vascular imaging across different modalities.** Upper panel: Cross-sectional brain images acquired using three distinct imaging approaches: (a) Our omnidirectional optical acoustic sensor demonstrating comprehensive vascular mapping with uniform sensitivity across different vessel orientations. (b) High-field (9.4T BioSpec 94/30) magnetic resonance angiography (MRA) with anatomical annotations showing cortex (CTX, pink outline), hippocampus (HIP, orange outline), and thalamus (TH, blue outline). (c) Commercial photoacoustic-ultrasound linear array system (Vevo LAZR-X) showing primarily horizontal vessel segments due to limited detection angle. Lower panel: Corresponding two-dimensional k-space transfer functions (TFs) revealing the spatial frequency coverage of each modality. The TF patterns demonstrate: (a) broad angular coverage and extended spatial frequency response of our omnidirectional sensor, (b) relatively uniform but limited high-frequency response in MRA, and (c) restricted angular coverage characteristic of linear array detection. Axes indicate spatial frequencies in kx and ky directions. Scale bars: 1 mm.

**5b. Comprehensive performance analysis of state-of-the-art ultrasound sensors**

A systematic comparison of various optical ultrasound sensing technologies, detailed in Supplementary Tables S1 and S2, reveals the significant advantages of our omnidirectional sensor design in addressing key performance trade-offs inherent to current systems. The comparative analysis encompasses critical parameters including sensor dimensions, detection sensitivity, operational bandwidth, angular coverage, and practical imaging capabilities in biological tissues.

In comparison, our omnidirectional sensor represents a significant advancement in addressing these limitations. With an average detection sensitivity of 1.5 mPa/Hz1/2 across an extended bandwidth from 0.3 to 80 MHz, it maintains optimal performance while providing full 180° angular coverage. This combination of features enables superior imaging capabilities, achieving penetration depths of approximately 20 mm in tissue phantoms and 10 mm in human skin - substantially exceeding the conventional optical sensors.

The performance advantages become particularly evident in practical photoacoustic microvascular imaging applications. As shown in Table S2, while focused piezoelectric transducers offer high resolution (15-90 μm lateral resolution), they suffer from limited detection angles (typically 48-49°) and restricted imaging depths. In contrast, our sensor's comprehensive angular coverage and enhanced sensitivity enable more detailed visualization of complex vascular networks, particularly beneficial for deep-tissue imaging where signal attenuation and scattering effects become significant.

These comparative results demonstrate that our omnidirectional sensor design successfully overcomes the traditional performance trade-offs between sensitivity, bandwidth, and angular coverage, while significantly extending practical imaging capabilities beyond current technological limitations.

**Table S1. Ultrasound sensitivities, detection angle of various optical ultrasound sensors.**

| Transducer | Sensing area  (µm2) | NEPD  (mPa/Hz1/2) | Bandwidth  (MHz) | Detection Angle  (°) | In vivo? | Image depth  (mm) |
| --- | --- | --- | --- | --- | --- | --- |
| Optomechanical resonator [13] | 177 (*d*=15 µm)  314 (*d*=20 µm) | 1.3 (at 10MHz)  2.3 (at 40MHz) | 3-30 | 120(>25%) | no | —— |
| Silicon-on-insulator resonator [14] | 0.11 | 9 | 10-240 | 148 | no | —— |
| Silicon-photonics acoustic detector [15] | 100 | 2.2 (TM mode)  9.8 (TE mode) | 10-210 | —— | yes | <1 mm |
| Plano-concave optical resonator [16] | 490 | 2.1 | 0.1-40 | 180 | yes | <1 mm |
| Planar Fabry-Perot resonators [17-19] | 3215 | 47 | 0.1-30 | 20 (at 10 MHz) | yes | 15mm on human arm |
| This work | 2.1×104 | 2.25 (at 10 MHz)  0.46 (at 40 MHz)  0.9 (at 70MHz) | 0.3-80 | 180 | yes | ~20 mm in sample and ~10 mm on human palm |

**Table S2.** **Performance of piezoelectric and optical sensors employed in photoacoustic microvasculature imaging.**

| **Transducer** | **Size**  **(µm2)** | **Bandwidth**  **(MHz)** | **Detection**  **Angle**  **(°)** | **Axial**  **resolution**  **(µm)** | **Lateral**  **resolution**  **(µm)** | **Image depth**  **(Scattering mimics/in vivo)** |
| --- | --- | --- | --- | --- | --- | --- |
| Focused LiNbO3 [20] | 7×106 | 10-180 | 53  (NA: 0.45) | 4.5  (10-180 MHz)  8.6  (10-120 MHz) | 18  (10-180 MHz)  29.6  (10-120 MHz) | 1.5 mm (human skin) |
| Transparent LiNbO3 [21] | 3.1×107 | 15-45 | 21.14  (NA: 0.18) | 40 | 144 | 14 mm (sample)  6.5 mm (human skin) |
| Focused  piezoelectric（V214-BB-RM）[22] | 2.8×107 | 32-67 | 48  (NA: 0.44) | 15 | 45 | 3.3 mm (sample)  0.7 mm (rat) |
| Focused  piezoelectric [23] | 2×107 | 0.1-35 | 49  (NA: 0.41) | —— | 90 | 2.5 mm (sample)  1 mm (human skin) |
| Polyvinylidene difluoride (PVDF) films  [24] | 9.5×105 | 0.3-40 | —— | 30 | 40 | 4mm  (human skin) |
| Planar Fabry-Perot [17-19] | 3215 | 0.1-30 | 20 | 45 | 60 | 15 mm  (human skin) |
| This work | 2.1×104 | 0.3-80 | 180 | 40 | 33 | 20 mm (sample)  10 mm (human skin) |

**References**

1. Bassan, M. Advanced interferometers and the search for gravitational waves. *Astrophysics and Space Science Library* **404**, 275-290 (2014).
2. Ma, W. *et al.* Laser frequency noise characterization by self-heterodyne with both long and short delay. *Applied Optics* **58**, 3555-3563 (2019).
3. Yuan, Z. *et al.* Correlated self-heterodyne method for ultra-low-noise laser linewidth measurements. *Opt. Express* **30**, 25147-25161 (2022).
4. Fowler, M. L. Phase-Based Frequency Estimation: A Review. *Digital Signal Processing* **12**, 590-615 (2002).
5. Boashash, B. Estimating and interpreting the instantaneous frequency of a signal. II. Algorithms and applications. *Proceedings of the IEEE* **80**, 540-568 (1992).
6. Köstli, K. P. & Beard, P. C. Two-dimensional photoacoustic imaging by use of Fourier-transform image reconstruction and a detector with an anisotropic response. *Appl. Opt.* **42**, 1899-1908 (2003).
7. Cox, B. T., Laufer, J. G., Kostli, K. P. & Beard, P. C. Experimental validation of photoacoustic k-space propagation models. *Photons Plus Ultrasound: Imaging and Sensing.* SPIE, 238-248 (2004).
8. Wise, E. S., Cox, B. T., Jaros, J. & Treeby, B. E. Representing arbitrary acoustic source and sensor distributions in Fourier collocation methods. *The Journal of the Acoustical Society of America* **146**, 278-288 (2019).
9. Treeby, B. E., Jaros, J., Rendell, A. P. & Cox, B. T. Modeling nonlinear ultrasound propagation in heterogeneous media with power law absorption using a k-space pseudospectral method. *The Journal of the Acoustical Society of America* **131**, 4324-4336 (2012).
10. Treeby, B. E. & Cox, B. T. k-Wave: MATLAB toolbox for the simulation and reconstruction of photoacoustic wave fields. *Journal of biomedical optics* **15**, 021312-021314 (2010).
11. Tanmayi, O., Jan, G. L. & Bradley, E. T. Vessek filtering of photoacoustic images. *Photons Plus Ultrasound: Imaging and Sensing.* SPIE*.* 319-328 (2013).
12. Frangi, A. F., Niessen, W. J., Vincken, K. L. & Viergever, M. A. Multiscale vessel enhancement filtering. *Medical Image Computing and Computer-Assisted Intervention,* 130-137 (1998).
13. Westerveld, W. J. *et al.* Sensitive, small, broadband and scalable optomechanical ultrasound sensor in silicon photonics. *Nat. Photonics* **15**, 341-345 (2021).
14. Shnaiderman, R. *et al.* A submicrometre silicon-on-insulator resonator for ultrasound detection. *Nature* **585**, 372-378 (2020).
15. Hazan, Y., Levi, A., Nagli, M. & Rosenthal, A. Silicon-photonics acoustic detector for optoacoustic micro-tomography. *Nat. Commun.* **13**, 1488 (2022).
16. Guggenheim, J. A. *et al.* Ultrasensitive plano-concave optical microresonators for ultrasound sensing. *Nat. Photonics* **11**, 714-719 (2017).
17. Zhang, E., Laufer, J. & Beard, P. Backward-mode multiwavelength photoacoustic scanner using a planar Fabry-Perot polymer film ultrasound sensor for high-resolution three-dimensional imaging of biological tissues. *Appl. Optics* **47**, 561-577 (2008).
18. Cox, B. T. & Beard, P. C. The frequency-dependent directivity of a planar fabry-perot polymer film ultrasound sensor. *IEEE Transactions on Ultrasonics Ferroelectrics and Frequency Control* **54**, 394-404 (2007).
19. Huynh, N. T. *et al.* A fast all-optical 3D photoacoustic scanner for clinical vascular imaging. *Nat. Biomed. Eng.* **9**, 638-655 (2025).
20. Aguirre, J. *et al.* Precision assessment of label-free psoriasis biomarkers with ultra-broadband optoacoustic mesoscopy. *Nat. Biomed. Eng.* **1**, 68 (2017).
21. Cho, S. *et al.* An ultrasensitive and broadband transparent ultrasound transducer for ultrasound and photoacoustic imaging in-vivo. *Nat. Commun.* **15**, 1444 (2024).
22. Zhang, H. F., Maslov, K., Stoica, G. & Wang, L. V. Functional photoacoustic microscopy for high-resolution and noninvasive in vivo imaging. *Nat. Biotechnol.* **24**, 848-851 (2006).
23. Bost, W., Lemor, R. & Fournelle, M. Optoacoustic Imaging of Subcutaneous Microvasculature With a Class one Laser. *IEEE T. Med. Imaging* **33**, 1900-1904 (2014).
24. Subochev, P. V. et al. Ultrawideband high density polymer-based spherical array for real-time functional optoacoustic micro-angiography. *Light: Science & Applications* **14**, 239, (2025).
